# Supplementary material for: Distinct cerebral 18F-FDG PET metabolic patterns in anti-N-methyl-D-aspartate receptor encephalitis patients with different trigger factors
Source: PubMed Central journal article supplement — Ther Adv Neurol Disord. 2021 Feb 24;14:1756286421995635. doi: 10.1177/1756286421995635 (PMC7919218; doi:10.1177/1756286421995635), 2021-02-24
Supplement: sj-pdf-1-tan-10.1177_1756286421995635.pdf [file sj-pdf-1-tan-10.1177_1756286421995635.pdf]

**Supplementary Fig.1** The flow chart of patients' enrollment.

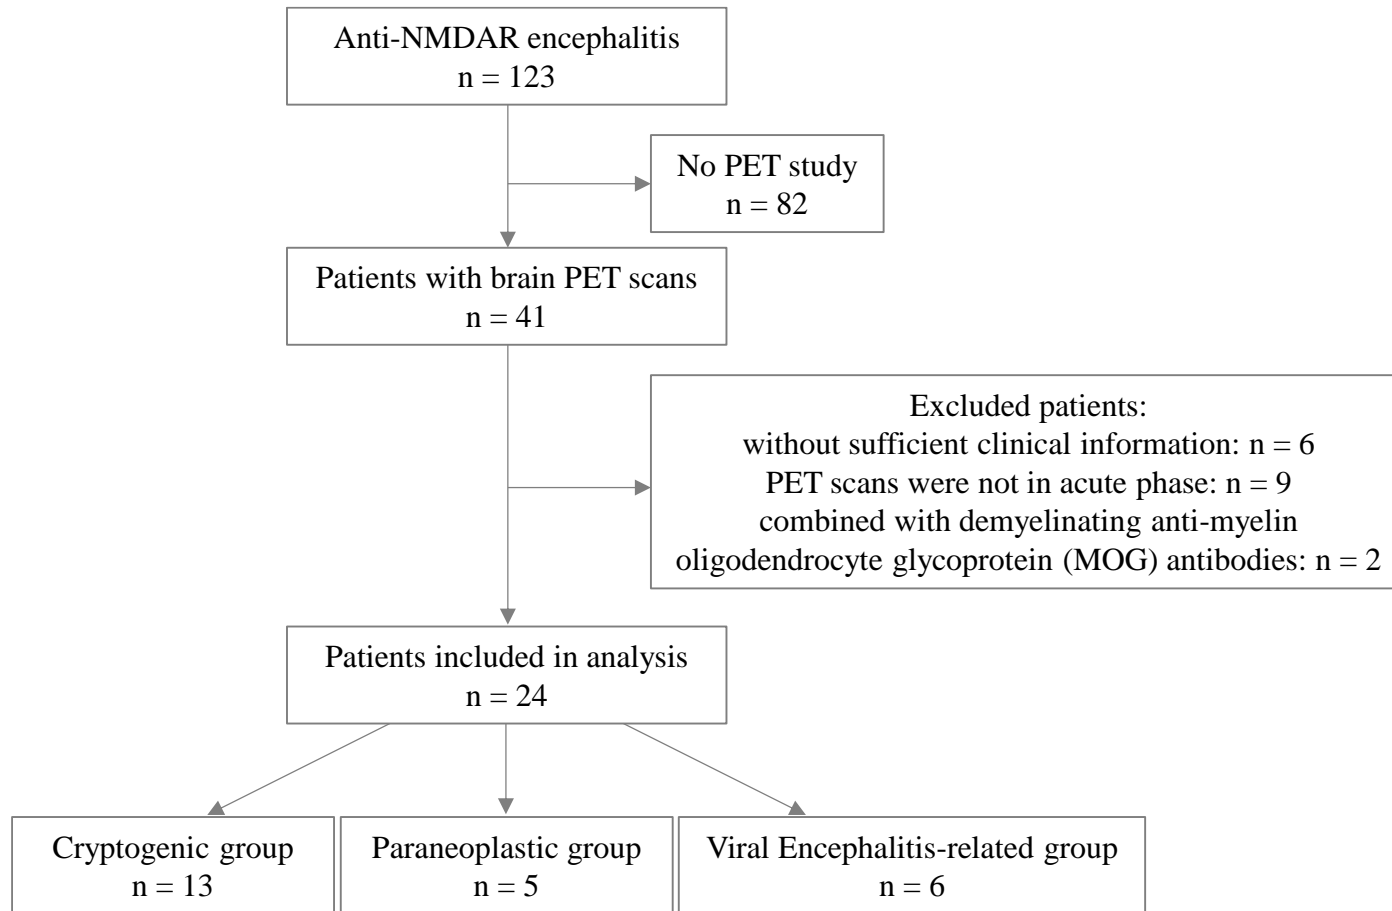

**Supplementary Table 1** The details of demographic and clinical information for individual patients

| Anti-NMDAR Encephalitis             | Gender | Age, y | Main clinical symptoms                                                                                                                      | Maximum mRS | ICU admission | CSF                          | EEG                                            | Interval between onset and Immunotherapies, d | Immunotherapies     | Interval between onset and PET scan, wk | Interval between the last seizure and PET scan, d | Treated with steroids before PET | Treated with sedative before PET | Treated with AEDs before PET | mRS at the time of PET | Follow-up time, y/mRS at the last follow-up |
|-------------------------------------|--------|--------|---------------------------------------------------------------------------------------------------------------------------------------------|-------------|---------------|------------------------------|------------------------------------------------|-----------------------------------------------|---------------------|-----------------------------------------|---------------------------------------------------|----------------------------------|----------------------------------|------------------------------|------------------------|---------------------------------------------|
| <i>Cryptogenic Group (13 cases)</i> |        |        |                                                                                                                                             |             |               |                              |                                                |                                               |                     |                                         |                                                   |                                  |                                  |                              |                        |                                             |
| 1.1                                 | F      | 19     | Psychiatric symptoms, cognitive impairment, seizures, speech dysfunction, movement disorder, decreased consciousness, autonomic dysfunction | 4           | No            | Normal WBC, normal protein   | Left diffuse slow wave and epileptic activity  | 21                                            | Steroids, IVIG      | 1                                       | 2                                                 | No                               | No                               | Yes                          | 3                      | 2.5/1                                       |
| 1.2                                 | M      | 33     | Psychiatric symptoms, cognitive impairment, seizures, movement disorder, decreased consciousness                                            | 4           | Yes           | Normal WBC, EP               | Normal                                         | 27                                            | Steroids, IVIG, RTX | 8                                       | 56                                                | No                               | Yes                              | Yes                          | 3                      | 4.3/0                                       |
| 1.3                                 | M      | 67     | Psychiatric symptoms, cognitive impairment, speech dysfunction, decreased consciousness                                                     | 4           | No            | Pleiocytosis, normal protein | NA                                             | 1                                             | Steroids, IVIG, CTX | 1                                       | No seizure                                        | Yes                              | No                               | No                           | 3                      | 1.3/1                                       |
| 1.4                                 | M      | 18     | Psychiatric symptoms, cognitive impairment, seizures, speech dysfunction, right lower limb movement disorder, decreased consciousness       | 4           | Yes           | Normal WBC, normal protein   | Left dominant slow wave activity               | 17                                            | Steroids, IVIG, RTX | 6                                       | 1                                                 | Yes                              | Yes                              | Yes                          | 3                      | 4.5/0                                       |
| 1.5                                 | M      | 21     | Psychiatric symptoms, cognitive impairment, seizures, speech dysfunction, movement disorder                                                 | 3           | No            | Normal WBC, normal protein   | Left slow wave activity                        | 5                                             | Steroids, IVIG, CTX | 1                                       | 9                                                 | Yes                              | No                               | Yes                          | 3                      | 3.5/0                                       |
| 1.6                                 | M      | 24     | Psychiatric symptoms, cognitive impairment, seizures, autonomic dysfunction                                                                 | 3           | No            | Pleiocytosis, normal protein | Normal                                         | 9                                             | Steroids, IVIG, RTX | 2                                       | 5                                                 | Yes                              | No                               | Yes                          | 3                      | 3.4/0                                       |
| 1.7                                 | F      | 21     | Psychiatric symptoms, cognitive impairment, seizures, speech dysfunction, decreased consciousness, dysgraphia                               | 4           | Yes           | Normal WBC, normal protein   | Diffuse slow wave activity                     | 19                                            | Steroids, IVIG, RTX | 18                                      | 128                                               | Yes                              | No                               | No                           | 2                      | 3.0/1                                       |
| 1.8                                 | M      | 25     | Psychiatric symptoms, cognitive impairment, seizures                                                                                        | 3           | No            | Normal WBC, normal protein   | Left dominant slow wave and epileptic activity | 32                                            | Steroids, IVIG, MMF | 21                                      | 17                                                | Yes                              | Yes                              | Yes                          | 2                      | 1.8/0                                       |
| 1.9                                 | M      | 24     | Psychiatric symptoms, cognitive impairment, seizures, speech dysfunction, movement disorder, decreased consciousness                        | 5           | Yes           | Pleiocytosis, EP             | Normal                                         | 20                                            | Steroids, IVIG, AZA | 2                                       | No seizure                                        | No                               | No                               | Yes                          | 3                      | 1.3/1                                       |
| 1.10                                | M      | 15     | Psychiatric symptoms, cognitive impairment, seizures, decreased consciousness                                                               | 4           | No            | Pleiocytosis, normal protein | NA                                             | 7                                             | IVIG                | 3                                       | 26                                                | No                               | No                               | No                           | 1                      | 3.7/0                                       |
| 1.11                                | M      | 58     | Psychiatric symptoms, cognitive impairment                                                                                                  | 3           | No            | Pleiocytosis, EP             | Diffuse slow wave activity                     | 1                                             | Steroids, IVIG      | 7                                       | No seizure                                        | Yes                              | Yes                              | No                           | 3                      | 0.9/2                                       |
| 1.12                                | M      | 16     | Psychiatric symptoms, cognitive impairment, seizures, speech dysfunction                                                                    | 3           | No            | Pleiocytosis, normal protein | Normal                                         | 10                                            | Steroids, IVIG, AZA | 10                                      | 58                                                | Yes                              | Yes                              | Yes                          | 3                      | 2.1/1                                       |
| 1.13                                | M      | 14     | Seizures, decreased consciousness, autonomic dysfunction                                                                                    | 3           | No            | Normal WBC, EP               | Diffuse slow wave activity                     | 59                                            | IVIG                | 9                                       | 2                                                 | Yes                              | No                               | Yes                          | 2                      | 1.3/0                                       |

| <b>Paraneoplastic Group (5 cases)</b>             |   |    |                                                                                                                                               |   |     |                              |                                                 |     |                         |    |            |     |     |     |   |       |
|---------------------------------------------------|---|----|-----------------------------------------------------------------------------------------------------------------------------------------------|---|-----|------------------------------|-------------------------------------------------|-----|-------------------------|----|------------|-----|-----|-----|---|-------|
| 2.1                                               | F | 16 | Psychiatric symptoms, cognitive impairment, seizures, speech dysfunction, movement disorder, decreased consciousness, central hypoventilation | 5 | Yes | Pleiocytosis, normal protein | Diffuse slow wave and epileptic activity        | 15  | Steroids, IVIG          | 30 | 72         | Yes | No  | Yes | 2 | 5.3/1 |
| 2.2                                               | F | 23 | Psychiatric symptoms, cognitive impairment, speech dysfunction, movement disorder, decreased consciousness, central hypoventilation           | 5 | Yes | Normal WBC, EP               | Diffuse slow wave activity                      | 8   | Steroids, IVIG, PE      | 35 | 111        | Yes | Yes | Yes | 2 | 4.3/1 |
| 2.3                                               | F | 20 | Psychiatric symptoms, cognitive impairment, seizures, speech dysfunction, movement disorder, decreased consciousness                          | 5 | Yes | Normal WBC, normal protein   | Diffuse slow wave activity                      | 7   | Steroids, IVIG          | 1  | 4          | No  | No  | Yes | 3 | 4.7/0 |
| 2.4                                               | F | 27 | Psychiatric symptoms, cognitive impairment, seizures, movement disorder, decreased consciousness, central hypoventilation                     | 5 | Yes | Normal WBC, normal protein   | Diffuse slow wave activity                      | 6   | Steroids                | 8  | 14         | Yes | No  | Yes | 4 | 5.6/0 |
| 2.5                                               | F | 23 | Psychiatric symptoms, cognitive impairment, seizures, movement disorder, decreased consciousness, central hypoventilation                     | 5 | Yes | Normal WBC, normal protein   | Normal                                          | 11  | Steroids, IVIG, PE      | 9  | 28         | Yes | No  | Yes | 2 | 1.9/0 |
| <b>Viral Encephalitis-related Group (6 cases)</b> |   |    |                                                                                                                                               |   |     |                              |                                                 |     |                         |    |            |     |     |     |   |       |
| 3.1                                               | F | 16 | Psychiatric symptoms, cognitive impairment, seizures, movement disorder, decreased consciousness, autonomic dysfunction                       | 4 | No  | Normal WBC, EP               | Right dominant slow wave and epileptic activity | 27  | Steroids, IVIG, PE, RTX | 6  | 60         | No  | Yes | Yes | 4 | 3.9/2 |
| 3.2                                               | M | 43 | Psychiatric symptoms, cognitive impairment, seizures, decreased consciousness                                                                 | 3 | No  | Normal WBC, EP, OCBs         | Normal                                          | 103 | Steroids                | 14 | 99         | No  | No  | No  | 3 | 0.8/2 |
| 3.3                                               | M | 69 | Psychiatric symptoms, cognitive impairment, speech dysfunction, decreased consciousness                                                       | 4 | No  | Normal WBC, EP, OCBs         | Normal                                          | 46  | Steroids, IVIG          | 1  | No seizure | No  | Yes | No  | 3 | 4.6/2 |
| 3.4                                               | M | 44 | Psychiatric symptoms, cognitive impairment, seizures, speech dysfunction, movement disorder, decreased consciousness                          | 5 | No  | Normal WBC, EP, OCBs         | Normal                                          | 39  | Steroids, RTX           | 5  | 33         | Yes | Yes | No  | 3 | 3.9/2 |
| 3.5                                               | M | 16 | Psychiatric symptoms, cognitive impairment, movement disorder, autonomic dysfunction, hypogeusia                                              | 4 | Yes | Normal WBC, EP, OCBs         | NA                                              | 8   | Steroids, AZA           | 4  | 32         | Yes | Yes | Yes | 3 | 2.9/2 |
| 3.6                                               | M | 18 | Psychiatric symptoms, cognitive impairment, speech dysfunction, movement disorder, decreased consciousness, autonomic dysfunction             | 4 | No  | Pleiocytosis, EP             | Right dominant slow wave activity               | 7   | Steroids, IVIG, AZA     | 20 | No seizure | Yes | Yes | Yes | 3 | 2.0/2 |

\*This patient had seizures after PET scan. *NMDAR*, N-methyl-D-aspartate receptor; *y*, years; *mRS*, modified Rankin Scale; *ICU*, intensive care unit; *CSF*, cerebrospinal fluid; *EEG*, electroencephalogram; *PET*, positron emission tomography; *wk*, weeks; *d*, days; *AEDs*, antiepileptic drugs; *F*, female; *WBC*, white blood cell count; *IVIG*, intravenous immunoglobulins; *M*, male; *EP*, elevated protein; *RTX*, rituximab; *NA*, not available; *CTX*, cyclophosphamide; *MMF*, mycophenolate mofetil; *AZA*, azathioprine; *PE*, plasma exchange; *OCBs*, oligoclonal bands.

**Supplementary Table 2** The details of demographic information for individual healthy subjects

---

| Healthy subjects | Gender | Age (Year) |
|------------------|--------|------------|
| 1                | M      | 31         |
| 2                | M      | 32         |
| 3                | F      | 63         |
| 4                | M      | 56         |
| 5                | M      | 55         |
| 6                | M      | 57         |
| 7                | M      | 56         |
| 8                | M      | 59         |
| 9                | F      | 57         |
| 10               | M      | 70         |

---
